# Supplementary material
Source: Springer Nature journal article supplement (https://www.springermedizin.de/resource/supplementary/13054_2012_1870_MOESM1_ESM.pdf/9711676)

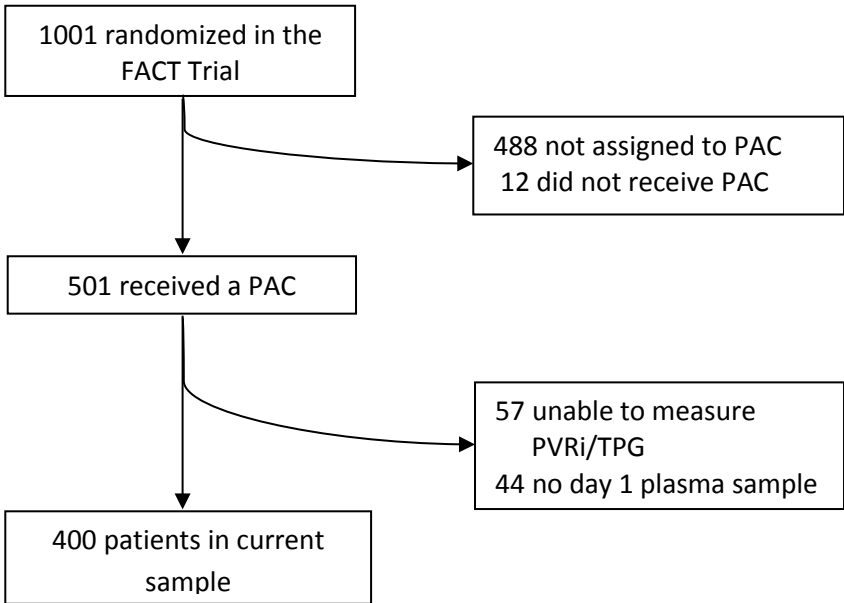

Supplement: MOESM1 [file 9711676]
